# Supplementary material for: Primary Site of Coxsackievirus B Replication in the Small Intestines: No Proof of Peyer’s Patches Involvement
Source: MDPI journal article supplement (doi:10.3390/microorganisms9122600), 2021-12-16
Supplement: s1 [file s1]

**Supplementary Table S1:** Number of small intestines showing positivity in the villi or smooth muscles in the infected mice by using different methods for localizing viral markers at different time points.

| Details of the infections                                                                                                                                                        | Days p.i.       | Doses and routes of Infection |      |                     |      |                     |      |                     |      |
|----------------------------------------------------------------------------------------------------------------------------------------------------------------------------------|-----------------|-------------------------------|------|---------------------|------|---------------------|------|---------------------|------|
|                                                                                                                                                                                  |                 | 5 x 10 <sup>3</sup>           |      | 5 x 10 <sup>5</sup> |      | 5 x 10 <sup>7</sup> |      | 5 x 10 <sup>9</sup> |      |
|                                                                                                                                                                                  |                 | ip                            | oral | ip                  | oral | ip                  | oral | ip                  | oral |
| <b>Set I</b><br><br>Swiss albino male mice infected with CVB3-Nancy 5 x 10 <sup>3</sup> , 5 x 10 <sup>5</sup> , 5 x 10 <sup>7</sup> and 5 x 10 <sup>9</sup> TCID <sub>50</sub> . | <b>Set I</b>    |                               |      |                     |      |                     |      |                     |      |
|                                                                                                                                                                                  | 3               | 3/3*                          | 3/3  | 3/3                 | 3/3  | 3/3                 | 3/3  | 3/3                 | 3/3  |
|                                                                                                                                                                                  | 7               | 3/3                           | 3/3  | 3/3                 | 3/3  | 3/3                 | 3/3  | 3/3                 | 3/3  |
|                                                                                                                                                                                  | 10              | 3/3                           | 3/3  | 3/3                 | 3/3  | 3/3                 | 3/3  | 3/3                 | 3/3  |
|                                                                                                                                                                                  | 14              | 1/3                           | 3/3  | 3/3                 | 3/3  | 3/3                 | 3/3  | 3/3                 | 3/3  |
|                                                                                                                                                                                  | 21              | 1/3                           | 3/3  | 1/3                 | 3/3  | 3/3                 | 3/3  | 3/3                 | 3/3  |
|                                                                                                                                                                                  | 28              | 0/3                           | 3/3  | 0/3                 | 3/3  | 1/3                 | 3/3  | 1/3                 | 3/3  |
|                                                                                                                                                                                  | 35              | 0/3                           | 0/3  | 0/3                 | 1/3  | 0/3                 | 1/3  | 0/3                 | 2/3  |
|                                                                                                                                                                                  | 48              | 0/3                           | 0/3  | 0/3                 | 0/3  | 0/3                 | 0/3  | 0/3                 | 0/3  |
|                                                                                                                                                                                  | 56              | 0/3                           | 0/3  | 0/3                 | 0/3  | 0/3                 | 1/3  | 0/3                 | 1/3  |
|                                                                                                                                                                                  | 63              | 0/3                           | 0/3  | 0/3                 | 0/3  | 0/3                 | 2/3  | 0/3                 | 2/3  |
|                                                                                                                                                                                  | 98              | 0/3                           | 0/3  | 0/3                 | 0/3  | 0/3                 | 0/3  | 0/3                 | 1/3  |
|                                                                                                                                                                                  | 147             | 0/3                           | 0/3  | 0/3                 | 0/3  | 0/3                 | 0/3  | 0/3                 | 0/3  |
| <b>Set II a</b><br><br>Swiss albino male mice infected with CVB4-JVB, dose of 5 x 10 <sup>7</sup> TCID <sub>50</sub> .                                                           | <b>Set II a</b> |                               |      |                     |      |                     |      |                     |      |
|                                                                                                                                                                                  | 2h              | ND <sup>o</sup>               | ND   | ND                  | ND   | 0/3                 | 1/3  | ND                  | ND   |
|                                                                                                                                                                                  | 4h              | ND                            | ND   | ND                  | ND   | 0/3                 | 2/3  | ND                  | ND   |
|                                                                                                                                                                                  | 6h              | ND                            | ND   | ND                  | ND   | 1/3                 | 3/3  | ND                  | ND   |
|                                                                                                                                                                                  | 8h              | ND                            | ND   | ND                  | ND   | 1/3                 | 3/3  | ND                  | ND   |
|                                                                                                                                                                                  | 24h             | ND                            | ND   | ND                  | ND   | 1/3                 | 3/3  | ND                  | ND   |
| <b>Set II b</b><br><br>CD1 ale mice infected with CVB4-JVB, dose of 5 x 10 <sup>7</sup> TCID <sub>50</sub> .                                                                     | <b>Set II b</b> |                               |      |                     |      |                     |      |                     |      |
|                                                                                                                                                                                  | 2h              | ND                            | ND   | ND                  | ND   | 0/3                 | 1/3  | ND                  | ND   |
|                                                                                                                                                                                  | 4h              | ND                            | ND   | ND                  | ND   | 1/3                 | 2/3  | ND                  | ND   |
|                                                                                                                                                                                  | 6h              | ND                            | ND   | ND                  | ND   | 1/3                 | 2/3  | ND                  | ND   |
|                                                                                                                                                                                  | 8h              | ND                            | ND   | ND                  | ND   | 1/3                 | 3/3  | ND                  | ND   |
|                                                                                                                                                                                  | 24h             | ND                            | ND   | ND                  | ND   | 1/3                 | 3/3  | ND                  | ND   |
| <b>Set III</b><br><br>CD1 male mice infected with eGFP-CVB3 at a dose of 5 x 10 <sup>7</sup> TCID <sub>50</sub> .                                                                | <b>Set III</b>  |                               |      |                     |      |                     |      |                     |      |
|                                                                                                                                                                                  | 2h              | ND                            | ND   | ND                  | ND   | 0/3                 | 1/3  | ND                  | ND   |
|                                                                                                                                                                                  | 4h              | ND                            | ND   | ND                  | ND   | 1/3                 | 2/3  | ND                  | ND   |
|                                                                                                                                                                                  | 6h              | ND                            | ND   | ND                  | ND   | 1/3                 | 1/3  | ND                  | ND   |
|                                                                                                                                                                                  | 8h              | ND                            | ND   | ND                  | ND   | 1/3                 | 2/3  | ND                  | ND   |
|                                                                                                                                                                                  | 24h             | ND                            | ND   | ND                  | ND   | 2/3                 | 3/3  | ND                  | ND   |

Mock infected control tissue results were not shown as they were negative. In all sets, 3 mice were used at all time points, as mock infected controls.

\*= 3/3 shows 3 positive tissues, each from a separate mouse/total number of mice

<sup>o</sup> = ND Not Done indicates which virus dosed were not used for infections.

 Selected for confirmation with VP1 staining by Methods 1 and 2 only.

 Selected for confirmation with VP1 staining by Methods 1, 2, and *In situ* hybridization.

 Done only by Method 1, RT-PCR or eGFP analysis.
